# Supplementary material
Source: PubMed Central journal article supplement (PMC3126137)

## Supplementary Information

### TRIM56 is a virus- and interferon-inducible E3 ubiquitin ligase that restricts pestivirus infection

Jie Wang, Baoming Liu, Nan Wang, Young-Min Lee, Chunming Liu, Kui Li

**Table S1. List of N<sup>pro</sup>-associated proteins identified by FLAG purification and mass spect analysis**

| Label | Protein Name                                                                       | Accession No. | Protein MW | Pep. Count | Protein Score | Protein Score C. I. % | Total Ion Score | Protein PI | Protein Expectation Score | Observed MW on gel |
|-------|------------------------------------------------------------------------------------|---------------|------------|------------|---------------|-----------------------|-----------------|------------|---------------------------|--------------------|
| N2    | N-Pro [Bovine viral diarrhea virus 1]                                              | gi 27777742   | 19032.7    | 3          | 56            | 0                     | 26              | 9.01       | 0.997631157               | 20±10              |
| N3    | N-Pro [Bovine viral diarrhea virus 1]                                              | gi 27777742   | 19032.7    | 4          | 93            | 99.978                | 49              | 9.01       | 0.000199054               | 25±10              |
| N4    | N-Pro [Bovine viral diarrhea virus 1]                                              | gi 27777742   | 19032.7    | 8          | 225           | 100                   | 145             | 9.01       | 1.25594E-17               | 30±10              |
|       | heat shock 27kDa protein 1 [Homo sapiens]                                          | gi 4504517    | 22768.5    | 10         | 464           | 100                   | 363             | 5.98       | 6.29463E-42               |                    |
| N5    | N-Pro [Bovine viral diarrhea virus 1]                                              | gi 27777742   | 19032.7    | 6          | 191           | 100                   | 120             | 9.01       | 3.15479E-14               | 35±10              |
| N6    | phosphoribosyl pyrophosphate synthetase-associated protein 1 [Homo sapiens]        | gi 4506131    | 39454.7    | 7          | 169           | 100                   | 113             | 6.73       | 1.99054E-12               |                    |
| N8    | ACTB protein [Homo sapiens]                                                        | gi 15277503   | 40194.1    | 13         | 538           | 100                   | 404             | 5.55       | 2.50594E-49               | 50±10              |
| N9    | tubulin, beta polypeptide [Homo sapiens]                                           | gi 57209813   | 47736      | 17         | 566           | 100                   | 420             | 4.7        | 3.97164E-52               | 60±10              |
| N10   | pyruvate kinase, muscle, isoform CRA_c [Homo sapiens]                              | gi 119598292  | 60203.1    | 14         | 280           | 100                   | 163             | 7.95       | 1.58114E-23               | 68±10              |
| N11   | heat shock 70kDa protein 8 isoform 1 [Homo sapiens]                                | gi 5729877    | 70854.2    | 10         | 207           | 100                   | 144             | 5.37       | 3.15479E-16               | 72±10              |
| N12   | tripartite motif-containing 56 [Homo sapiens]                                      | gi 30794216   | 81436.5    | 9          | 109           | 100                   | 71              | 8.02       | 1.99054E-06               | 80±10              |
|       | minichromosome maintenance complex component 7 isoform 1 [Homo sapiens]            | gi 33469968   | 81256.6    | 14         | 152           | 100                   | 64              | 6.08       | 9.97631E-11               |                    |
| N14   | kinesin-related protein [Homo sapiens]                                             | gi 1155084    | 119200.1   | 29         | 579           | 100                   | 315             | 5.52       | 1.99054E-53               | 135±30             |
| N16   | KIAA0913, isoform CRA_d [Homo sapiens]                                             | gi 119574909  | 169236.9   | 21         | 226           | 100                   | 93              | 6.16       | 3.97164E-18               | 200±40             |
| N18   | protein kinase, DNA-activated, catalytic polypeptide, isoform CRA_c [Homo sapiens] | gi 119607088  | 468686.9   | 10         | 82            | 99.872                | 60              | 6.75       | 0.000997631               | >220               |

Note:

- The picture on the right shows the SDS-PAGE and Coomassie blue staining of cellular proteins purified from control HeLa and HeLa-FHNpro cells by anti-Flag antibody. The individual protein bands purified from HeLa-FHNpro cells were labeled as “N#”.
- Only proteins with an expectation score <1 are shown in Table S2.
- N<sup>pro</sup> was identified from multiple protein bands (N2 through N5, highlighted in yellow in Table S2). The N<sup>pro</sup> bands with higher molecular masses are likely ubiquitinated N<sup>pro</sup>.
- None of the N<sup>pro</sup>-associated proteins identified by mass spect analysis in HeLa-FHNpro cells overlaps with those identified from control HeLa cells (protein bands C1 through C6 in the HeLa lane).
- N4 and N12 protein bands contain more than 1 cellular protein.

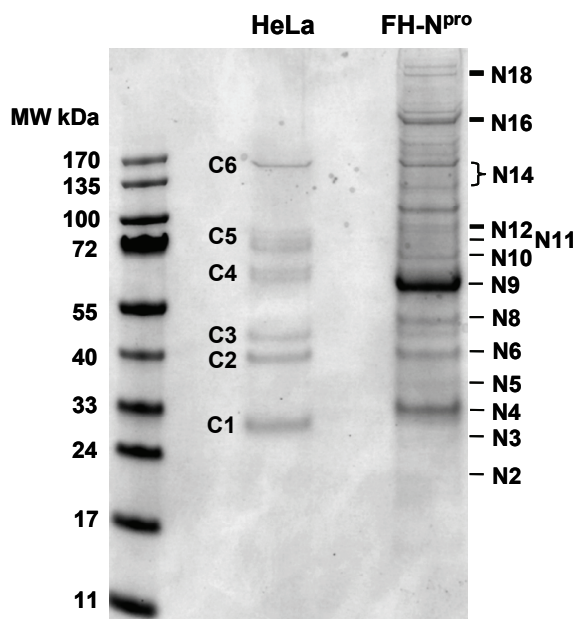

Supplement: supp_85_8_3733__1.pdf [file supp_85_8_3733__1.pdf]
